# Supplementary material for: A High-Performance Flag-Type Triboelectric Nanogenerator for Scavenging Wind Energy toward Self-Powered IoTs
Source: MDPI journal article supplement (doi:10.3390/ma15103696), 2022-05-21
Supplement: s1 [file s1]

# Supporting Information

## A High Performance Flag-type Triboelectric Nanogenerator for Scavenging Energy Harvesting toward Self-powered IoTs

Yongjiu Zou <sup>1,2,†</sup>, Minzheng Sun <sup>1,†</sup>, Fei Yan <sup>1,†</sup>, Taili Du <sup>1,2</sup>, Ziyue Xi <sup>1</sup>, Fangming Li <sup>1</sup>, Chuanqing Zhu <sup>1</sup>, Hao Wang <sup>1</sup>, Junhao Zhao<sup>1,\*</sup>, Peiting Sun <sup>1,2,\*</sup> and Minyi Xu <sup>1,\*</sup>

1 Dalian Key Lab of Marine Micro/Nano Energy and Self-powered Systems, Marine Engineering College, Dalian Maritime University, Dalian, 116026, China; zouyj0421@dlmu.edu.cn (Y.Z.), zheng3034304299@163.com (M.S.), yf1169@dlmu.edu.cn (F.Y.), dutaili@dlmu.edu.cn (T.D.), yyds@dlmu.edu.cn (Z.X.), lifangming@dlmu.edu.cn (F.L.), zcq@dlmu.edu.cn (C.Z.), hao8901@dlmu.edu.cn (H.W.)

2 Collaborative Innovation Research Institute of Autonomous Ship, Dalian Maritime University, Dalian 116026, China; sunptg@dlmu.edu.cn

\* Correspondence: haoger@dlmu.edu.cn.(J.Z.), sunptg@dlmu.edu.cn (P.S.), xuminyi@dlmu.edu.cn (M.X.)

† These authors contribute equally to this work.

**Keywords:** triboelectric nanogenerators, wind energy, distributed sensors, Internet of things

## Supporting Figures and Tables:

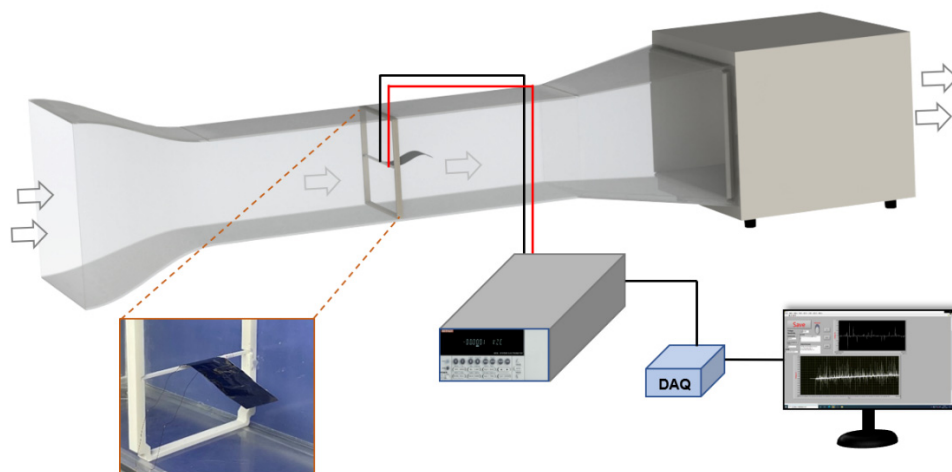

Figure S1. The schematic illustration of the experimental setup.

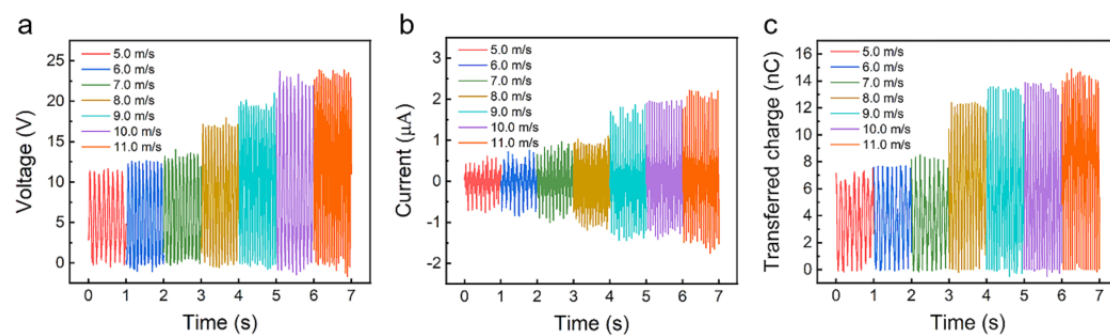

Figure S2. (a)  $V_{oc}$ , (b)  $I_{sc}$ , and (c)  $Q_{sc}$  of the untreated flag TENG varied with wind speed.

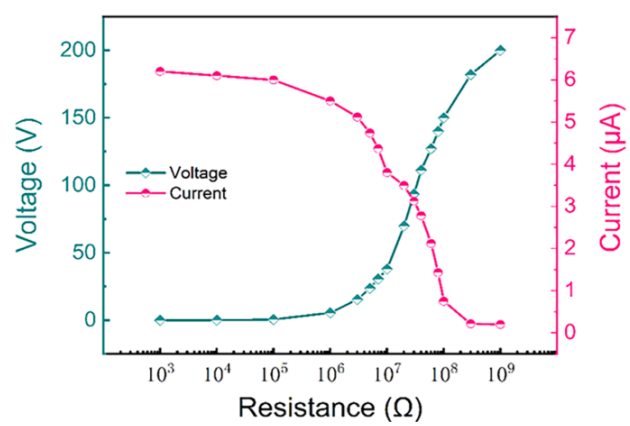

Figure S3. The voltages and currents measured at variable external resistance values from  $10^3$  Ω to 1 GΩ for the HF-TENG.

Table S1. A summary of structure and performance of various wind-driven TENGs

| Device                          | Structure | Power density (mW/cm <sup>3</sup> ) | V (m/s) | Ref.    |
|---------------------------------|-----------|-------------------------------------|---------|---------|
| F-TENG                          | Flag type | 0.0011                              | 12.1    | [1]     |
| Flag-type TENG                  | Flag type | 0.0408                              | 7.5     | [2]     |
| FS-TENG                         | Flag type | 0.049                               | 6.96    | [3]     |
| F-TENG #3                       | Flag type | 0.0598                              | 7.0     | [4]     |
| Hybrid nanogenerator            | Flap type | 0.0616                              | 10.2    | [5]     |
| Flow-driven TENG                | Flag type | 0.25                                | 7.6     | [6]     |
| HF-TENG                         | Flag type | 0.394                               | 11      | present |
| ATNG                            | Flap type | 1                                   | 20      | [7]     |
| Wind-driven TENG                | Flag type | 2.2                                 | 18      | [8]     |
| Hybridized TENG                 | Flap type | 2.46                                | 15      | [9]     |
| Elasto-aerodynamics-driven TENG | Flap type | 9                                   | 15      | [10]    |

## Reference

1. Su, Y.;Xie, G.;Xie, T.;Zhang, H.;Ye, Z.;Jing, Q.;Tai, H.;Du, X.;Jiang, Y., Wind energy harvesting and self-powered flow rate sensor enabled by contact electrification. *Journal of Physics D: Applied Physics* **2016**, 49, 215601.
2. Wang, Y.;Yang, E.;Chen, T.;Wang, J.;Hu, Z.;Mi, J.;Pan, X.;Xu, M., A novel humidity resisting and wind direction adapting flag-type triboelectric nanogenerator for wind energy harvesting and speed sensing. *Nano Energy* **2020**, 78, 105279.
3. Ye, C.;Dong, K.;An, J.;Yi, J.;Peng, X.;Ning, C.;Wang, Z. L., A triboelectric–electromagnetic hybrid nanogenerator with broadband working range for wind energy harvesting and a self-powered wind speed sensor. *ACS Energy Letters* **2021**, 6, 1443-1452.
4. Zhao, Z.;Wei, B.;Wang, Y.;Huang, X.;Li, B.;Lin, F.;Ma, L.;Zhang, Q.;Zou, Y.;Yang, F.;Pang, H.;Xu, J.;Pan, X., An array of flag-type triboelectric nanogenerators for harvesting wind energy. *Nanomaterials (Basel)* **2022**, 12, 721.
5. Ma, M.;Zhang, Z.;Liao, Q.;Zhang, G.;Gao, F.;Zhao, X.;Zhang, Q.;Xun, X.;Zhang, Z.;Zhang, Y., Integrated hybrid nanogenerator for gas energy recycle and purification. *Nano Energy* **2017**, 39, 524-531.
6. Wang, S.;Mu, X.;Yang, Y.;Sun, C.;Gu, A. Y.;Wang, Z. L., Flow-driven triboelectric generator for directly powering a wireless sensor node. *Adv Mater* **2015**, 27, 240-248.
7. Guo, H.;He, X.;Zhong, J.;Zhong, Q.;Leng, Q.;Hu, C.;Chen, J.;Tian, L.;Xi, Y.;Zhou, J., A nanogenerator for harvesting airflow energy and light energy. *J. Mater. Chem. A* **2014**, 2, 2079-2087.
8. Zheng, H.;Zi, Y.;He, X.;Guo, H.;Lai, Y.-C.;Wang, J.;Zhang, S. L.;Wu, C.;Cheng, G.;Wang, Z. L., Concurrent harvesting of ambient energy by hybrid nanogenerators for wearable self-powered systems and active remote sensing. *Acs Applied Materials & Interfaces* **2018**, 10, 14708-14715.
9. Wang, S.;Wang, X.;Wang, Z. L.;Yang, Y., Efficient scavenging of solar and wind energies in a smart city. *ACS Nano* **2016**, 10, 5696-5700.
10. Wang, S.;Mu, X.;Wang, X.;Gu, A. Y.;Wang, Z. L.;Yang, Y., Elasto-aerodynamics-driven triboelectric nanogenerator for scavenging air-flow energy. *ACS Nano* **2015**, 9, 9554-9563.
